# Supplementary material for: Proteomic Analysis Highlights the Impact of the Sphingolipid Metabolizing Enzyme β-Galactosylceramidase on Mitochondrial Plasticity in Human Melanoma
Source: Int J Mol Sci. 2024 Mar 6;25(5):3062. doi: 10.3390/ijms25053062 (PMC10931563; doi:10.3390/ijms25053062)
Supplement: Supplementary file 1 [file ijms-25-03062-s001.zip › Supplementary Table S1.xlsx]

## Sheet: Legend
Supplementary Table S1
List of the top 200 genes whose expression is negatively correlated to GALC expression in human skin melanoma.
Data mining was performed on the cBioPortal for Cancer Genomics platform (TCGA Skin Cutaneous Melanoma, Firehose legacy, PanCancer Atlas) to identify those genes whose expression was negatively related to GALC expression in 472 human skin melanoma specimens. Rows are ordered according to the P value.

## Sheet: Melanoma genes
Negatively correlated gene	Cytoband	Spearman's correlation	P value	Q Value
ATAD3A	1p36.33	-0.439	1.22e-23	1.22e-20
ATG4D	19p13.2	-0.436	2.36e-23	2.15e-20
MRPL41	9q34.3	-0.43	1.11e-22	8.26e-20
PAM16	16p13.3	-0.428	1.87e-22	1.25e-19
PTGES2	9q34.11	-0.424	5.41e-22	3.01e-19
ZMYND19	9q34.3	-0.422	7.57e-22	4.1e-19
ATP6V0B	1p34.1	-0.41	1.42e-20	5.91e-18
HSF1	8q24.3	-0.41	1.49e-20	6.1e-18
MRPL37	1p32.3	-0.408	2.27e-20	8.42e-18
CYC1	8q24.3	-0.407	2.92e-20	1.06e-17
ZNF593	1p36.11	-0.4	1.58e-19	4.87e-17
KIFC2	8q24.3	-0.398	2.12e-19	6.24e-17
RECQL4	8q24.3	-0.398	2.39e-19	6.93e-17
RPUSD1	16p13.3	-0.397	2.85e-19	8.15e-17
PPP1R35	7q22.1	-0.396	3.72e-19	1.05e-16
AURKAIP1	1p36.33	-0.396	3.81e-19	1.06e-16
SSNA1	9q34.3	-0.39	1.34e-18	3.45e-16
AGPAT2	9q34.3	-0.389	1.59e-18	3.98e-16
PQBP1	Xp11.23	-0.389	1.8e-18	4.43e-16
ATAD3B	1p36.33	-0.389	1.81e-18	4.43e-16
COX5B	2q11.2	-0.388	2.16e-18	5.05e-16
MRPL23	11p15.5	-0.387	2.68e-18	6.03e-16
EMD	Xq28	-0.386	3.16e-18	6.97e-16
MZT2B	2q21.1	-0.385	4.28e-18	9.02e-16
DUS1L	17q25.3	-0.384	5.31e-18	1.09e-15
MCRIP2	16p13.3	-0.382	7.63e-18	1.53e-15
TIMM44	19p13.2	-0.381	9.14e-18	1.81e-15
THOP1	19p13.3	-0.38	1.06e-17	2.06e-15
DAZAP1	19p13.3	-0.38	1.25e-17	2.41e-15
HRAS	11p15.5	-0.379	1.37e-17	2.62e-15
TMEM222	1p36.11	-0.379	1.44e-17	2.73e-15
RABL6	9q34.3	-0.377	2.2e-17	3.96e-15
RPL35	9q33.3	-0.376	2.82e-17	5.01e-15
EEF1D	8q24.3	-0.375	3.5e-17	6.09e-15
MROH1	8q24.3	-0.374	3.69e-17	6.38e-15
PEX14	1p36.22	-0.374	4.26e-17	7.29e-15
SNAPC4	9q34.3	-0.372	5.58e-17	9.32e-15
TNFRSF14	1p36.32	-0.371	6.98e-17	1.16e-14
PMPCA	9q34.3	-0.371	7.23e-17	1.18e-14
BAIAP2L2	22q13.1	-0.371	7.24e-17	1.18e-14
AK1	9q34.11	-0.371	8.28e-17	1.33e-14
THAP4	2q37.3	-0.37	8.82e-17	1.4e-14
ENDOG	9q34.11	-0.369	1.05e-16	1.66e-14
NSMF	9q34.3	-0.369	1.11e-16	1.73e-14
NSUN5	7q11.23	-0.368	1.5e-16	2.27e-14
SNHG6	8q13.1	-0.367	1.81e-16	2.71e-14
TIGD5	8q24.3	-0.367	1.86e-16	2.76e-14
LSM4	19p13.11	-0.365	2.57e-16	3.71e-14
ESRRA	11q13.1	-0.365	2.69e-16	3.85e-14
FBXW5	9q34.3	-0.364	2.85e-16	4.05e-14
RAD23A	19p13.13	-0.364	2.9e-16	4.09e-14
UCK1	9q34.13	-0.364	3.09e-16	4.32e-14
ATG4B	2q37.3	-0.364	3.41e-16	4.69e-14
SLC25A10	17q25.3	-0.363	3.49e-16	4.76e-14
TRAF2	9q34.3	-0.362	4.25e-16	5.69e-14
TPRN	9q34.3	-0.362	4.29e-16	5.69e-14
CLASRP	19q13.32	-0.361	5.43e-16	7.15e-14
SLC52A2	8q24.3	-0.36	6.35e-16	8.26e-14
EDF1	9q34.3	-0.36	6.78e-16	8.77e-14
SH3GLB2	9q34.11	-0.359	8.08e-16	1.01e-13
CPTP	1p36.33	-0.358	1.08e-15	1.32e-13
STK25	2q37.3	-0.357	1.2e-15	1.44e-13
MRPS34	16p13.3	-0.357	1.26e-15	1.5e-13
UAP1L1	9q34.3	-0.357	1.29e-15	1.53e-13
ZFAND2B	2q35	-0.357	1.3e-15	1.53e-13
TONSL	8q24.3	-0.357	1.34e-15	1.57e-13
RPL8	8q24.3	-0.356	1.41e-15	1.63e-13
MRPL12	17q25.3	-0.356	1.59e-15	1.82e-13
ADCK5	8q24.3	-0.356	1.62e-15	1.85e-13
SNHG9	16p13.3	-0.355	1.76e-15	1.99e-13
DMAP1	1p34.1	-0.355	1.98e-15	2.18e-13
MRPS2	9q34.3	-0.354	2.23e-15	2.44e-13
TXN	9q31.3	-0.354	2.43e-15	2.65e-13
B4GALT2	1p34.1	-0.352	3.21e-15	3.41e-13
DPP7	9q34.3	-0.352	3.22e-15	3.41e-13
COMTD1	10q22.2	-0.352	3.25e-15	3.42e-13
FBXL6	8q24.3	-0.352	3.28e-15	3.44e-13
SURF2	9q34.2	-0.352	3.57e-15	3.65e-13
C1ORF159	1p36.33	-0.351	3.64e-15	3.71e-13
FBXL15	10q24.32	-0.351	3.77e-15	3.82e-13
RPS2	16p13.3	-0.351	3.89e-15	3.92e-13
C15ORF61	15q23	-0.35	4.55e-15	4.47e-13
PIM3	22q13.33	-0.35	5.14e-15	5e-13
UQCC5	3p21.1	-0.349	5.52e-15	5.29e-13
CEMP1	16p13.3	-0.349	5.74e-15	5.48e-13
RPS15	19p13.3	-0.349	5.93e-15	5.62e-13
MXD3	5q35.3	-0.349	5.94e-15	5.62e-13
USF2	19q13.12	-0.349	6.28e-15	5.91e-13
TOMM40	19q13.32	-0.348	6.63e-15	6.2e-13
NOC2L	1p36.33	-0.348	6.87e-15	6.4e-13
PAXX	9q34.3	-0.348	7.23e-15	6.67e-13
NDUFB9	8q24.13	-0.347	8.21e-15	7.55e-13
NDUFS8	11q13.2	-0.347	9.14e-15	8.25e-13
INO80E	16p11.2	-0.346	9.36e-15	8.41e-13
ACAP3	1p36.33	-0.346	9.59e-15	8.58e-13
NDUFA7	19p13.2	-0.345	1.16e-14	1.02e-12
BCS1L	2q35	-0.345	1.2e-14	1.05e-12
INTS11	1p36.33	-0.345	1.3e-14	1.14e-12
CCNQ	Xq28	-0.345	1.33e-14	1.15e-12
ATP5ME	4p16.3	-0.345	1.33e-14	1.15e-12
PTTG1	5q33.3	-0.344	1.39e-14	1.19e-12
LRSAM1	9q33.3-q34.11	-0.344	1.4e-14	1.19e-12
POP7	7q22.1	-0.344	1.45e-14	1.23e-12
AUP1	2p13.1	-0.344	1.5e-14	1.26e-12
ARRDC1-AS1	9q34.3	-0.343	1.69e-14	1.41e-12
PIN1	19p13	-0.343	1.85e-14	1.51e-12
UBE2S	19q13.42	-0.343	1.86e-14	1.51e-12
SHARPIN	8q24.3	-0.343	1.95e-14	1.57e-12
NDUFA8	9q33.2	-0.342	1.97e-14	1.58e-12
PTDSS2	11p15.5	-0.342	1.98e-14	1.58e-12
ZNHIT1	7q22.1	-0.342	2.12e-14	1.67e-12
KLHL17	1p36.33	-0.342	2.13e-14	1.67e-12
UBALD1	16p13.3	-0.342	2.17e-14	1.7e-12
IFRD2	3p21.31	-0.342	2.24e-14	1.74e-12
PKMYT1	16p13.3	-0.341	2.38e-14	1.84e-12
NANS	9q22.33	-0.341	2.39e-14	1.84e-12
LAMTOR4	7q22.1	-0.341	2.44e-14	1.86e-12
EIF2B4	2p23.3	-0.341	2.46e-14	1.86e-12
THAP3	1p36.31	-0.341	2.52e-14	1.9e-12
POMT1	9q34.13	-0.341	2.59e-14	1.94e-12
DXO	6p21.33	-0.34	2.85e-14	2.12e-12
DPM2	9q34.11	-0.34	2.88e-14	2.14e-12
EXOSC4	8q24.3	-0.34	3.06e-14	2.24e-12
COX5A	15q24.2	-0.34	3.21e-14	2.34e-12
PUSL1	1p36.33	-0.34	3.32e-14	2.4e-12
RNF126	19p13.3	-0.34	3.36e-14	2.42e-12
ERI3	1p34.1	-0.339	3.88e-14	2.76e-12
RPL37A	2q35	-0.339	3.89e-14	2.76e-12
MACROD1	11q13.1	-0.339	4.02e-14	2.84e-12
ANKRD13D	11q13.2	-0.338	4.26e-14	2.97e-12
PELI3	11q13.2	-0.338	4.4e-14	3.06e-12
UQCRHL	1p36.21	-0.338	4.74e-14	3.29e-12
VPS28	8q24.3	-0.338	4.76e-14	3.29e-12
MECR	1p35.3	-0.338	4.85e-14	3.32e-12
NUDC	1p36.11	-0.337	4.95e-14	3.37e-12
IMPDH1	7q32.1	-0.337	5.17e-14	3.51e-12
GRINA	8q24.3	-0.337	5.29e-14	3.57e-12
IDH3G	Xq28	-0.337	5.47e-14	3.67e-12
NDUFV1	11q13.2	-0.336	6.2e-14	4.13e-12
RPLP2	11p15.5	-0.336	6.61e-14	4.37e-12
AMDHD2	16p13.3	-0.335	8.06e-14	5.24e-12
MZT2A	2q21.1	-0.335	8.12e-14	5.27e-12
AIFM2	10q22.1	-0.335	8.28e-14	5.35e-12
RPLP1	15q23	-0.334	8.55e-14	5.49e-12
SNHG7	9q34.3	-0.334	8.58e-14	5.49e-12
SRM	1p36.22	-0.333	1.01e-13	6.38e-12
COX6A1	12q24.31	-0.333	1.03e-13	6.51e-12
PTCD1	7q22.1	-0.333	1.08e-13	6.73e-12
MIGA2	9q34.11	-0.333	1.09e-13	6.78e-12
NDUFB7	19p13.12	-0.333	1.12e-13	6.92e-12
USP35	11q14.1	-0.333	1.15e-13	7.06e-12
WDR13	Xp11.23	-0.333	1.15e-13	7.07e-12
HGH1	8q24.3	-0.333	1.15e-13	7.07e-12
SNRNP70	19q13.33	-0.333	1.19e-13	7.25e-12
NDUFA11	19p13.3	-0.333	1.19e-13	7.26e-12
PPIH	1p34.2	-0.332	1.2e-13	7.3e-12
NDUFS7	19p13.3	-0.332	1.34e-13	7.97e-12
NCS1	9q34.11	-0.332	1.37e-13	8.12e-12
RPS9	19q13.42	-0.331	1.47e-13	8.65e-12
UQCRH	1p33	-0.331	1.61e-13	9.36e-12
CROCC	1p36.13	-0.331	1.64e-13	9.53e-12
RRP9	3p21.2	-0.33	1.86e-13	1.07e-11
RASSF7	11p15.5	-0.33	1.88e-13	1.07e-11
TKT	3p21.1	-0.33	1.95e-13	1.11e-11
DGAT1	8q24.3	-0.33	2.03e-13	1.14e-11
DVL1	1p36.33	-0.329	2.27e-13	1.26e-11
BBLN	9q34.11	-0.329	2.28e-13	1.26e-11
NHP2	5q35.3	-0.329	2.33e-13	1.28e-11
GNB1L	22q11.21	-0.328	2.87e-13	1.54e-11
C6ORF136	6p21.33	-0.327	3.17e-13	1.68e-11
MIB2	1p36.33	-0.327	3.21e-13	1.69e-11
TRMT1	19p13.13	-0.326	3.5e-13	1.83e-11
SPOUT1	9q34.11	-0.326	3.51e-13	1.83e-11
RPL36	19p13.3	-0.326	3.54e-13	1.84e-11
UBA52	19p13.1-p12	-0.326	3.64e-13	1.89e-11
ATP6V1F	7q32.1	-0.326	4.12e-13	2.1e-11
RHOT2	16p13.3	-0.325	4.54e-13	2.29e-11
ECI1	16p13.3	-0.324	4.94e-13	2.45e-11
CHTF18	16p13.3	-0.324	4.96e-13	2.45e-11
GFUS	8q24.3	-0.324	5.16e-13	2.54e-11
UROD	1p34.1	-0.324	5.33e-13	2.61e-11
NAA80	3p21.31	-0.324	5.44e-13	2.65e-11
KTI12	1p32.3	-0.324	5.74e-13	2.79e-11
SNRPA	19q13.2	-0.323	6.36e-13	3.04e-11
FLYWCH1	16p13.3	-0.323	6.56e-13	3.12e-11
TPRA1	3q21.3	-0.323	6.72e-13	3.17e-11
RPS16	19q13.2	-0.323	6.9e-13	3.24e-11
UQCC3	11q12.3	-0.322	7.14e-13	3.34e-11
MLST8	16p13.3	-0.322	7.26e-13	3.39e-11
TNFRSF14-AS1	1p36.32	-0.322	7.41e-13	3.45e-11
CUEDC2	10q24.32	-0.322	7.46e-13	3.47e-11
E4F1	16p13.3	-0.322	7.89e-13	3.65e-11
PVT1	8q24.21	-0.322	7.93e-13	3.66e-11
ADPRS	1p34.3	-0.322	8.24e-13	3.79e-11
ANKRD19P	9q22.31	-0.321	8.36e-13	3.84e-11
PPM1G	2p23.3	-0.321	8.66e-13	3.97e-11
TSPO	22q13.2	-0.321	9.35e-13	4.25e-11
ANKRD39	2q11.2	-0.321	9.39e-13	4.25e-11
MAD2L2	1p36.22	-0.321	9.56e-13	4.31e-11
SNRPB	20p13	-0.32	1.03e-12	4.62e-11
