# Supplementary material for: Proteomic Analysis Highlights the Impact of the Sphingolipid Metabolizing Enzyme β-Galactosylceramidase on Mitochondrial Plasticity in Human Melanoma
Source: Int J Mol Sci. 2024 Mar 6;25(5):3062. doi: 10.3390/ijms25053062 (PMC10931563; doi:10.3390/ijms25053062)
Supplement: Supplementary file 1 [file ijms-25-03062-s001.zip › Supplementary Table S2.xlsx]

## Sheet: Legend
Supplementary Table S2
List of the top 200 genes whose expression is negatively correlated to GALC expression in human tumor cell lines and various human cancers.
Data mining was performed on the cBioPortal for Cancer Genomics platform (TCGA, Firehose legacy, PanCancer Atlas) to identify those genes whose expression was negatively related to GALC expression in human cancer cell lines [Cancer Cell Line Encyclopedia (Broad 2019)] and different human tumors (TCGA, Firehose legacy, PanCancer Atlas). Rows are ordered according to the P value.

## Sheet: Foglio1
Cancer Cell Line Encyclopedia	Skin Cutaneous Melanoma	Uterine Corpus Endometrial Carcinoma	Kidney Renal Clear Cell Carcinoma	Bladder Urothelial Carcinoma	Breast Invasive Carcinoma	Lung Adenocarcinoma
NXPH4	ATAD3A	ZMYND19	NDUFS8	ENDOG	SNRPA	DAZAP1
HINT1	ATG4D	KRT18	LMF1	ZMYND19	TOMM40	PUS1
ATP5MC3	MRPL41	SNX8	SLC25A39	SSNA1	UBE2S	SLC25A10
SHMT2	PAM16	KRT8	LSM4	SRM	UQCRH	DUS1L
CYFIP2	PTGES2	NDUFA6	NDUFA3	SURF2	PIF1	SNHG6
LSM7	ZMYND19	EIF5A	COX17	MRPS2	CDCA3	PFDN2
TCOF1	ATP6V0B	CLIC1	PHKG2	RRP1	LSM4	ZMYND19
NDUFS7	HSF1	RRP7A	LRRC46	HSF1	AURKB	SNRPA
NOL12	MRPL37	PPP1CA	NDUFS6	SAPCD2	RECQL4	FBRSL1
MRPL23	CYC1	PSMB7	MIEN1	SLC27A4	PDCD5	MRPL12
TSPAN33	ZNF593	UPP1	COMMD4	PMPCA	TRMU	FLAD1
BCL2	KIFC2	HRAS	ATP5ME	NOP16	MXD3	SUPV3L1
TFAP4	RECQL4	PUSL1	SRA1	RPL35	MCM7	RTKN
INO80E	RPUSD1	HSD17B10	MRPL12	RRP9	PTTG1	SNHG17
THOP1	PPP1R35	PFN1	TAF10	UQCRC1	PUS1	RRS1
THAP4	AURKAIP1	PRELID1	CCDC24	SNRPA	RANBP1	PTGES2
DCTPP1	SSNA1	PSMB6	MPV17L2	ENTR1	MRPL12	NOP58
SNHG9	AGPAT2	PGP	HGH1	PACSIN3	SRM	SLC25A39
SNHG6	PQBP1	SSNA1	COPE	SPOUT1	DDX39A	RRP12
MRPS34	ATAD3B	POLR2F	DDA1	ACOT7	UQCRHL	TONSL
RPS15	COX5B	DRAP1	OXLD1	SNAPC4	TIMM44	FAM83H
MRPL4	MRPL23	UQCRC1	ANKRD54	EDF1	ADRM1	HSF1
NHP2	EMD	MRPL38	MED25	COQ4	PPP1R14B	WDR74
PPIF	MZT2B	PTGES2	UQCRQ	PSMB7	DTYMK	RECQL4
FNDC9	DUS1L	CFL1	SARS2	PPP1R14B	PDAP1	ATAD3B
BICD2	MCRIP2	GAPDH	PGP	RABL6	SAC3D1	SMPD4
NUBP2	TIMM44	PSMD13	MRPL41	ATAD3B	ALYREF	SHARPIN
QTRT1	THOP1	TUBA1C	RABEP2	MRTO4	ATAD3A	TRAF2
RPUSD2	DAZAP1	PAFAH1B3	PNKP	THOP1	PUSL1	SFXN4
POLR3K	HRAS	IFRD2	CCDC28B	TUBB4B	CENPM	MRPS5
CELSR2	TMEM222	OVCA2	C9ORF16	TRUB2	TCOF1	DPM2
SSNA1	RABL6	DDX54	G6PC3	CKS2	HAUS8	SRM
RPL35	RPL35	ACTB	COX4I1	PRELID1	RRP1	NOC4L
TIMM13	EEF1D	TIMM13	ZDHHC24	PSMG4	CCNQ	PPP1R35
COMTD1	MROH1	LMNA	COX6B1	EXOSC4	POP7	PPP1R14B
TEX19	PEX14	NDUFS7	NDUFA2	IFRD2	E2F1	POP7
PPIH	SNAPC4	VARS	TIMM50	MRPL12	EXOSC4	SAPCD2
GLE1	TNFRSF14	SH3GL1	CLTB	URM1	MUTYH	CHTOP
HSPE1	PMPCA	NCAPH2	NDUFS7	SNHG7	ZDHHC18	SCRIB
ZMYND19	BAIAP2L2	TSPO	PRADC1	RAD23A	POLR2F	TMEM120B
TMEM201	AK1	EIF5AL1	GIPC1	POP7	TMEM201	ZC3H3
MCRIP2	THAP4	NOC4L	NUTF2	TXN	TACC3	NOP2
MARS2	ENDOG	EXOSC4	SMG9	TOMM40	TROAP	PAM16
ADM5	NSMF	ZDHHC12	C11ORF49	HRAS	NASP	SLC52A2
COQ4	NSUN5	PPIA	UBL5	SNHG3	RTKN	FAM136A
HIP1R	SNHG6	NCLN	ATP5MC1	NDUFA8	RFC2	GNL3
TMEM268	TIGD5	FBXL6	MXD3	EIF5A	ZMYND19	SLC39A4
IMP4	LSM4	NAA10	POLR2L	TBRG4	HSF1	ARPC5L
MCAT	ESRRA	CLN6	SMIM29	DPM2	NAA10	COMTD1
URM1	FBXW5	ARPC4	TIMM23	COMTD1	MRPL11	STK25
MIR600HG	RAD23A	COMMD4	PFDN6	RPL7A	MFSD2B	EXOSC4
RPUSD1	UCK1	ARRDC1	TOMM40	MAP6D1	CDT1	GTPBP4
ANKRD13B	ATG4B	NUDT1	ATP5MF	UBAC1	PPM1G	BRIX1
CKS2	SLC25A10	EIF6	RNASEK	DAZAP1	H2AFX	TOMM40
PKMYT1	TRAF2	SLC22A18AS	NAP1L4	RABEPK	RBM38	TEDC2
NDUFAF8	TPRN	ACOT7	DUS1L	SLC52A2	MIIP	SAC3D1
C3ORF62	CLASRP	TXN2	PAXX	ARHGAP8	DAZAP1	MRPL9
SF3A2	SLC52A2	LSM10	BOLA2	NOC2L	MAGOH	PMPCA
NDUFB10	EDF1	POLR2L	SLC39A13	NHP2	DDX49	HGS
LEAP2	SH3GLB2	AURKAIP1	FDX2	PTGES2	NOP16	ADCK5
DHFR	CPTP	IMP4	GPS1	MRPL38	LSM7	PDAP1
HRAS	STK25	NDOR1	PCBP4	AURKAIP1	RPUSD3	C19ORF48
C10ORF62	MRPS34	RNF126	PSENEN	TRMT1	SLC52A2	C1ORF35
RPLP1	UAP1L1	DDX56	ACOT8	NDUFB9	MRTO4	PAXX
SNHG7	ZFAND2B	RRP9	RHPN1	CYC1	ATAD3B	PVT1
MRPS26	TONSL	THOP1	UNC119	COPE	CENPW	PYCR1
MZT2B	RPL8	TOMM40	FLAD1	CCT7	EIF5A	C2CD4D
CHCHD2	MRPL12	TRAF2	UQCR10	ZNF706	NCBP2AS2	RRP9
NDUFB7	ADCK5	PKMYT1	PEX16	RRP12	TOP1MT	COPS7B
HSPD1	SNHG9	TPI1	MRPS15	RPS7	CMC2	HGH1
GINS2	DMAP1	CIAO2B	IFRD2	DVL1	PSMG3	POLR2J
MRRF	MRPS2	TBL3	DCAKD	PSMG3	SEM1	NAT9
SMARCA4	TXN	NDUFA9	BLOC1S1	TIMM23	TIMM50	SYT7
VDAC1P2	B4GALT2	NTMT1	NDUFA13	PA2G4	MRPS12	CRTC2
LEF1	DPP7	VPS18	MRPS26	ATAD3A	MRPL2	PPM1G
KIAA0930	COMTD1	BOLA2	NFKBIB	NDUFA11	PSRC1	SNHG1
GNB1L	FBXL6	CLPP	NDUFA7	CCDC124	CDC20	BCCIP
LINC00494	SURF2	PSMB3	RPUSD1	IMP4	NOP2	PUSL1
SFXN4	C1ORF159	MRPL28	BRMS1	C9ORF78	BIRC5	MRPS2
PDHA1	FBXL15	CLUH	C19ORF24	MRPL41	CDC45	THOP1
DDX51	RPS2	SLC52A2	SGTA	POLR2F	ERI3	MLF2
CLPP	C15ORF61	NTHL1	NDUFB2-AS1	SEC61B	SLC25A19	SNHG3
DUS1L	PIM3	MRPS11	UQCC2	REXO4	UBE2C	DBNDD1
PLEKHJ1	SMIM4	JPT1	ARRDC1-AS1	CARM1	SPINDOC	LONP1
TRABD	CEMP1	PMPCA	UBE2L3	WDR74	RPS19BP1	DDX54
DYRK2	RPS15	COX6A1	TRAPPC1	H2AFX	ACOT7	WDR5
VAV3	MXD3	COX8A	HIGD2A	TCOF1	RALY	SNRPF
SHMT1	USF2	PUS1	PSMB3	FBXL6	PFDN2	DDX39A
APTX	TOMM40	CYTOR	COX6C	ATF4	GRK6	COX6C
MRPL37	NOC2L	NQO2	COX6A1	RANGAP1	U2AF1	MRPL38
P2RY11	PAXX	CSK	FKBP2	UBE2S	EBP	UBE2S
TRIR	NDUFB9	SIRT6	CCDC12	MIIP	CCDC137	PRELID3A
RRP8	NDUFS8	RECQL4	ANAPC15	NCLN	RPP21	HSPE1
TRAF2	INO80E	NDUFB8	POP5	MXD3	LIN37	SNHG7
SNAPC4	ACAP3	CDT1	NSUN5	LSM4	CTU2	CYC1
BTG2	NDUFA7	TIMM10	ELOB	TIMM44	PTGES2	DDX55
MZT2A	BCS1L	EIF3I	HMBS	ARPC5L	CCDC167	PTCD1
AK2	INTS11	DNLZ	DPM2	NDUFAF2	TONSL	CCDC150
POLRMT	CCNQ	GFER	PTOV1	ANKRD19P	SNRPA1	EXOSC1
MRPS2	ATP5ME	RNPEPL1	SLC52A2	LSM7	NARF	UBE2M
DDX31	PTTG1	NDUFS8	FAM71E1	TRIR	DGKZ	MZT2B
PHB2	LRSAM1	GSTO1	BANF1	ATP5F1D	ECE2	CBX4
UCK1	POP7	MLST8	ASPSCR1	NTMT1	FBXL6	TIGD5
DUT	AUP1	PKP3	B4GALT7	DOHH	SNRPD1	RABL6
DDX12P	ARRDC1-AS1	SNRNP25	ATP5F1E	MRRF	SNRPC	TOP1MT
CHAF1A	PIN1	EIF3B	PUSL1	HMOX2	UBALD2	DNAJC9
NOTCH1	UBE2S	TBRG4	COX7B	SURF6	PPAN	KAT2A
ATP5MC1	SHARPIN	PSMC3	COX5A	PPIF	BANF1	PTCD3
CLUH	NDUFA8	MRPS34	C6ORF136	TIMM13	PUF60	TMUB1
TTF2	PTDSS2	RPUSD1	TEX264	TRAF2	PFN1	LBHD1
NDUFAF4	ZNHIT1	TIMM44	UBL7	TSTA3	RAD23A	LSM4
CHCHD6	KLHL17	LSM7	ATG4D	PKMYT1	BUD31	DDX51
C1QBP	UBALD1	PSMC5	ADRM1	INPP5E	HSD17B10	SMG5
IMP3	IFRD2	SPATA2L	NUBP2	TRAIP	NFKBIB	TWNK
POLR1D	PKMYT1	TMEM191A	PSMC4	DDX49	CHEK2	DTYMK
RPS17	NANS	COPS6	C19ORF53	PPIH	SNRPG	TRAIP
UBE2I	LAMTOR4	FZR1	ABHD11	PAM16	NR2C2AP	ATP5MD
UBE2O	EIF2B4	RTKN	OTUB1	SFXN4	RBM17	VPS72
RAPGEF1	THAP3	NDUFB2	FASTK	AGPAT2	PSMC3	EXOSC5
POLE3	POMT1	TSTA3	DYNLRB1	PPM1G	NUDT5	C12ORF65
LEF1-AS1	DXO	REEP4	ELOF1	MFSD12	DDX12P	ELOC
POLR2F	DPM2	MRPL41	HES6	SNHG15	CTU1	HDGF
MTFP1	EXOSC4	DOHH	ARRDC1	PRDX1	PHGDH	NOP16
ATG4D	COX5A	MRTO4	ATOX1	DTYMK	CDKN2D	NDUFS8
INPP5E	PUSL1	ETHE1	CCNQ	GAS2L1	RAD54L	TROAP
TRMO	RNF126	SCO2	MRPL20-AS1	ATP5MD	FAM136A	CCT3
UBE2D2	ERI3	PPP1R14B	USP35	LRSAM1	GNB1L	FBXL6
SNORA52	RPL37A	ATAD3A	MCRS1	NDUFB7	CEBPB	EIF5A
SLC7A5	MACROD1	XRCC6	NDUFAF3	GADD45GIP1	NUDT1	JPT1
RPLP2	ANKRD13D	MRPS2	TRPM4	BOLA2	POLD1	TAF6
ATP5F1D	PELI3	CCM2	ALG3	MRPS17	TBRG4	BCL2L12
ADCK2	UQCRHL	FAM83H	CCNO	SHARPIN	SNHG6	SNRPB
AMH	VPS28	NME1	ROMO1	PUS1	SUV39H1	ZNF598
SELENOO	MECR	URM1	PTRH1	BOP1	NCAPH2	DVL1
RANBP3	NUDC	GPX1	FAM173A	PAXX	SHMT2	CCZ1P-OR7E38P
PHGDH	IMPDH1	COX4I1	TMEM175	RPL14	KIFC1	NSMF
PMPCA	GRINA	ATP5F1D	TMA7	SF3A2	MRPS5	PSMD4
NTHL1	IDH3G	MVD	SLC25A22	RAD51	PQBP1	KRTCAP2
PPARGC1B	NDUFV1	MRPL12	MRPL38	DPH7	SNHG15	CBX8
PIN1	RPLP2	ETFB	COX5B	KIF9	WDR74	ANKRD39
HSPD1P6	AMDHD2	GRPEL1	AUP1	RECQL4	COPS7B	LZTS2
TMEM243	MZT2A	MAD1L1	BSG	JPT1	NDUFB9	WDR34
PUS1	AIFM2	UQCRQ	B3GAT3	COX6C	AUNIP	TIMM44
PDSS1	RPLP1	SH3BGRL3	NDUFA11	ELOC	NDUFA11	PAFAH1B3
KYAT1	SNHG7	NSUN5	NAPA	DDX56	MRPL14	SAMD1
DANCR	SRM	WDR18	CIAO3	PUSL1	CDCA5	ANKRD13D
NDUFAF5	COX6A1	MRPS5	TCOF1	C9ORF16	EIF5AL1	TIMM23
KATNB1	PTCD1	LGALS1	C19ORF73	EBP	SCNM1	MTPAP
SLC38A1	MIGA2	CLTB	TIMM44	METTL26	RNASEH2A	AIFM2
FH	NDUFB7	SNRPA	NDUFA1	SKA1	C6ORF136	INTS8
NDUFA11	USP35	MRPL2	PPP6R1	PVT1	PHF5A	POLD1
MIPEPP3	WDR13	TRMU	MAP1LC3A	CEACAM19	HMGA1	C12ORF73
PCNA	HGH1	RANGAP1	POLR2J	TPRN	PIMREG	GTPBP3
USP36	SNRNP70	SCYL1	PRR5	RPL12	CKS2	NUDT5
PEBP1	NDUFA11	GINS2	PAM16	PTTG1	ATF4	TSEN54
SLC25A28	PPIH	HGH1	ITPA	SAC3D1	TEDC2	KIFC2
ATP6V0B	NDUFS7	UQCR11	AURKAIP1	SCRIB	KIF2C	H2AFX
TOMM22	NCS1	SLC16A3	COPS9	TKT	TUBA1B	ATAD3A
RNF126	RPS9	RHOC	TMEM138	DNLZ	ESS2	EIF2B4
FBXW9	UQCRH	ZNF593	SERF2	MRPS15	SIRT7	METTL26
CLHC1	CROCC	SESN2	NAA10	PPAN	PFDN6	TSACC
SNRPE	RRP9	ALDOA	APRT	ZNF511	MLF2	UBE2T
SRSF1	RASSF7	MRPL27	PSMB6	AUP1	MCM5	CCDC137
COX6A1	TKT	PSMA4	SLC35C2	EXOSC2	MAD2L2	TBRG4
CCDC124	DGAT1	MFSD13A	BUD23	RPUSD1	HGH1	TMEM52
PFKM	DVL1	ITPKA	MRPS12	NR2C2AP	MRPL38	NOC2L
NSUN4	C9ORF16	CYBA	MRPS11	PFDN6	CENPA	TERT
MAP2K7	NHP2	APRT	CCDC137	DDX39A	MRPL4	GTF2IRD1
LRRC45	GNB1L	SLC39A4	POLR3K	GRK6	PRMT1	UBE2V2
NDUFAF6	C6ORF136	POLR2E	TRAF7	SNRNP25	CCZ1P-OR7E38P	DPH7
PA2G4	MIB2	DTYMK	MLF2	GTF3C5	CYC1	SFSWAP
TMEM161B-AS1	TRMT1	TUBA4A	LOC728743	UQCC3	ILKAP	MCM7
LSM4	SPOUT1	NOL12	NDUFB9	RPL8	MRPS15	NDUFB9
CENPM	RPL36	SPOUT1	APOO	EIF5AL1	B4GALT2	SRRT
SNRNP25	UBA52	PPIH	MRPL28	MRPS25	PRELID1	THAP4
SETBP1	ATP6V1F	NDUFS3	ZNHIT1	ASB6	PSMA7	NT5C
MED22	RHOT2	RFC2	ZNF428	PRAG1	KIF18B	NME2
LDHB	ECI1	MRPL17	EEF2KMT	PDHA1	MRPS24	CCT7
RN7SL75P	CHTF18	POLRMT	S100A11	MRPS24	NOC2L	TRAP1
RABEPK	TSTA3	MRPL23	RAB4B	ESRRA	TPI1	ATG4D
ANKRD16	UROD	ACD	SSNA1	FBXW5	TALDO1	BUD31
RPL19	NAA80	MBD3	NDUFA6	FARSA	POLR2H	NUP85
DOHH	KTI12	HYPK	TIMM17B	HGH1	LOC642846	PSMG3
SERHL	SNRPA	ANXA2	CAPN10	MRPS5	SNRPD2	PRKRIP1
AKR1A1	FLYWCH1	SLC27A4	TSTA3	TUBB4A	PKMYT1	RHPN1
CSNK1G2	TPRA1	PHLDA2	HMOX2	STX10	SNHG3	ZNF511
PLA2G6	RPS16	PDXK	CHMP2A	RUVBL2	NDUFS5	NECAB3
GOLGA8UP	UQCC3	H2AFX	LSM7	ATRIP	LYAR	SLC7A5
DDX11	MLST8	CYC1	ZFPM1	MAP2K2	CTRL	COX6A1
H2AFY	TNFRSF14-AS1	GCAT	MYPOP	SMYD5	PSMB4	MRTO4
BCS1L	CUEDC2	HAUS7	ARFGAP1	WDR34	CDC25A	MTX1
PHF5A	E4F1	RHOG	CLCN7	MRPS18A	MRPL36	PPRC1
C12ORF73	PVT1	ATP5MC1	NDUFAF8	NAA10	ZFAND2B	HRAS
WDR91	ADPRHL2	GSS	TMEM223	HNRNPAB	PPIH	RNF208
SNHG3	ANKRD19P	NDUFV2	GPR137	RPL36	DPH7	PFDN6
CIAO3	PPM1G	SLC25A11	RANGRF	RRP7A	GAPDH	RBM28
NOP2	TSPO	TIMM8B	SNX22	BYSL	SNHG12	CDCA3
STX16-NPEPL1	ANKRD39	TRPM2	HSPBP1	ANKRD13B	CIAO2B	MRPL58
NDUFA1	MAD2L2	MPG	TUBG1	RPL18	MRPL51	PPAN
ILKAP	SNRPB	NFKB2	SAMD10	PLEKHJ1	EBNA1BP2	IDI2
