# Supplementary material for: Proteomic Analysis Highlights the Impact of the Sphingolipid Metabolizing Enzyme β-Galactosylceramidase on Mitochondrial Plasticity in Human Melanoma
Source: Int J Mol Sci. 2024 Mar 6;25(5):3062. doi: 10.3390/ijms25053062 (PMC10931563; doi:10.3390/ijms25053062)
Supplement: Supplementary file 1 [file ijms-25-03062-s001.zip › Supplementary Table S3.xlsx]

## Sheet: Legend
Supplementary Table S3
List of the downregulated proteins following GALC overexpression in A2058 and A375 human melanoma cells.
Spread-sheet A: GALC downregulated proteins
List of the 98 proteins whose amount was reduced by more than 33% in GALC-overexpressing cells when compared to mock cells. Quantification of protein levels was perfomed on four biological replicates of A2058-mock cells, A375-mock cells, A2058up-GALC cells, and A375-upGALC cells. Columns: UniprotKB/Swiss-Prot identifier, description of the protein, gene name, average peak level for the four cell …
Spread-sheet B: Peak values
Columns: UniprotKB/Swiss-Prot identifier, protein peak levels in the four biological replicates of A2058-mock cells, A375-mock cells, A2058up-GALC cells, and A375-upGALC cells.

## Sheet: A) GALC downregulated proteins
UniprotKB/Swiss-Prot identifier	Protein	Gene	Average peak value A2058-mock	Average peak value A375-mock	Average peak value A2058-upGALC	Average peak value A375-upGALC	Fold Change	P value	Q value
H31	H3 Clustered Histone 1	HIST1H3A	991463	3.14592e+06	0	0	2.96711e-06	9.67271e-14	8.26362e-13
RPF2	Ribosome Production Factor 2 Homolog	RPF2	319539	467592	0	0	1.13656e-05	7.34886e-14	7.17356e-13
ABRAL	ABRA C-Terminal Like	ABRACL	403146	377622	0	0	1.15993e-05	7.64483e-14	7.17356e-13
GRWD1	Glutamate Rich WD Repeat Containing 1	GRWD1	220308	395893	0	0	1.41678e-05	7.50669e-14	7.17356e-13
UQCC2	Ubiquinol-Cytochrome C Reductase Complex Assembly Factor 2	UQCC2	327526	279828	0	0	1.45445e-05	7.839e-14	7.23713e-13
BAG6	BAG Cochaperone 6	BAG6	324818	343682	0	0	1.45477e-05	1.10367e-13	9.29026e-13
KAD3	Adenylate Kinase 3	AK3	621384	159785	0	0	1.51135e-05	1.8053e-13	1.4976e-12
COF2	Cofilin 2	CFL2	303174	242257	0	0	1.60754e-05	7.99497e-14	7.26395e-13
GON7	GON7 Subunit Of KEOPS Complex	GON7	291531	222514	0	0	1.72423e-05	8.46028e-14	7.45021e-13
KRT86	Keratin 86	KRT86	55766	2.12084e+06	0	0	2.30648e-05	1.16855e-12	8.91829e-12
BRK1	BRICK1 Subunit Of SCAR/WAVE Actin Nucleating Complex	BRK1	132039	181868	0	0	2.53547e-05	7.31278e-14	7.17356e-13
PIHD1	PIH1 Domain Containing 1	PIH1D1	249843	417136	0	0	5.82862e-05	5.70412e-07	2.51155e-06
LYAG	Alpha Glucosidase	GAA	481454	282908	80410.1	0	5.83746e-05	3.25855e-08	1.69562e-07
ULA1	NEDD8 Activating Enzyme E1 Subunit 1	NAE1	311363	452109	142418	0	6.1934e-05	3.36427e-07	1.5656e-06
UBP7	Ubiquitin Specific Peptidase 7	USP7	254146	350823	0	0	6.34414e-05	9.74836e-07	4.16412e-06
H2A1J	H2A Clustered Histone 14	HIST1H2AJ	265386	1.22403e+06	0	0	0.000177536	0.000269854	0.000551656
TBL2	Transducin Beta Like 2	TBL2	479838	381187	256585	0	0.000292142	0.00128364	0.00220645
MTX2	Metaxin 2	MTX2	150332	403526	0	0	0.000300531	5.09994e-05	0.000137697
MPPB	Peptidase, Mitochondrial Processing Subunit Beta	PMPCB	1.18421e+06	803231	588135	0	0.000823429	3.51253e-05	0.00010258
THIM	Acetyl-CoA Acyltransferase 2	ACAA2	946007	383568	308090	0	0.00103121	1.64451e-05	5.60306e-05
NUP62	Nucleoporin 62	NUP62	1.08899e+06	413823	130801	258749	0.0010782	0.0131485	0.0162904
ACSL4	Acyl-CoA Synthetase Long Chain Family Member 4	ACSL4	739005	430008	362044	0	0.00109252	3.43146e-05	0.000101245
SOX5	SRY-Box Transcription Factor 5	SOX5	0	749783	0	0	0.00115562	0.000182889	0.000400515
GGH	Gamma-Glutamyl Hydrolase	GGH	3.38354e+06	784981	3.49276e+06	0	0.00116124	0.000196538	0.000418245
TXTP	Solute Carrier Family 25 Member 1	SLC25A1	1.31386e+06	265905	529119	0	0.00123926	1.5787e-05	5.44364e-05
CASP7	Caspase 7	CASP7	2.4436e+06	2.73415e+06	1.423e+06	1.86735e+06	0.00124003	0.013262	0.0163602
LSM8	LSM8 Homolog, U6 Small Nuclear RNA Associated	LSM8	572538	501151	481455	0	0.00129984	0.000124367	0.000305146
SDHB	Succinate Dehydrogenase Complex Iron Sulfur Subunit B	SDHB	1.1102e+06	642095	1.24065e+06	0	0.00134779	0.000260453	0.000534345
PGRC2	Progesterone Receptor Membrane Component 2	PGRMC2	1.10474e+06	575556	1.1125e+06	0	0.00135415	0.000206933	0.000433875
MUC18	Melanoma Cell Adhesion Molecule	MCAM	1.13845e+06	479512	1.015e+06	0	0.00139667	0.000161193	0.000376596
NIPS2	Nipsnap Homolog 2	NIPSNAP2	460981	0	0	0	0.00147766	0.000183226	0.000400515
KLC2	Kinesin Light Chain 2	KLC2	238145	206625	0	0	0.0015102	0.00468463	0.00687556
ACO13	Acyl-CoA Thioesterase 13	ACOT13	772487	266216	480917	0	0.00157257	6.48423e-05	0.000168707
GLCM	Glucosylceramidase Beta 1	GBA	2.33926e+06	572304	3.09521e+06	0	0.00160311	0.000421782	0.000804755
CPNE1	Copine 1	CPNE1	428210	336617	393869	0	0.00169278	0.0188238	0.0209902
CP51A	Cytochrome P450 Family 51 Subfamily A Member 1	CYP51A1	322313	22596.8	0	0	0.00185454	0.00425191	0.00638787
TSN	Translin	TSN	693854	245770	624727	0	0.00188511	0.000138586	0.000333303
IF4G2	Eukaryotic Translation Initiation Factor 4 Gamma 2	EIF4G2	596967	256395	568715	0	0.00199211	0.000196556	0.000418245
MGST1	Microsomal Glutathione S-Transferase 1	MGST1	2.36242e+06	221194	2.12033e+06	0	0.00212067	0.000144871	0.000344082
ACOT1	Acyl-CoA Thioesterase 1	ACOT1	1.39426e+06	190504	1.23309e+06	0	0.00218499	0.000146719	0.00034703
CISD2	CDGSH Iron Sulfur Domain 2	CISD2	723579	306855	1.04392e+06	0	0.00219187	0.000438602	0.000825837
TMED5	Transmembrane P24 Trafficking Protein 5	TMED5	450348	231267	815213	0	0.00281467	0.000675747	0.00123973
S100B	S100 Calcium Binding Protein B	S100B	481497	590941	474829	0	0.0063227	0.0557082	0.0494375
SUCB1	Succinate-CoA Ligase ADP-Forming Subunit Beta	SUCLA2	685765	389494	552427	49726	0.00662811	0.00870835	0.0116736
CLP1L	Cleft Lip And Palate Transmembrane Protein 1-Like Protein	CLPTM1L	388511	0	0	0	0.00721681	0.0143156	0.0171397
URM1	Ubiquitin Related Modifier 1	URM1	280933	558519	0	455629	0.00727391	0.0114101	0.0147429
RRS1	Ribosome Biogenesis Regulator 1 Homolog	RRS1	319064	531716	0	471482	0.00729761	0.0126711	0.0159055
MTND	Acireductone Dioxygenase 1	ADI1	338437	575031	0	620923	0.00791032	0.0155477	0.0183117
DC1L2	Dynein Cytoplasmic 1 Light Intermediate Chain 2	DYNC1LI2	285595	0	0	0	0.00822546	0.014373	0.0171397
YTHD2	YTH N6-Methyladenosine RNA Binding Protein F2	YTHDF2	249296	412266	0	483875	0.00921335	0.0168025	0.0194297
ANM5	Protein Arginine Methyltransferase 5	PRMT5	166855	287123	0	257252	0.00926481	0.0125139	0.0157989
AP1M1	Adaptor Related Protein Complex 1 Subunit Mu 1	AP1M1	173821	385547	0	755626	0.0135413	0.0273989	0.0277576
DBNL	Drebrin Like	DBNL	2.18434e+06	1.94912e+06	1.51527e+06	182641	0.014436	0.0340816	0.0332337
PON2	Paraoxonase 2	PON2	1.78901e+06	163027	2.42299e+06	65267.4	0.0149544	0.0261691	0.0268442
CSN3	COP9 Signalosome Subunit 3	COPS3	373834	146569	355940	99751.2	0.0149686	0.0246391	0.0255495
LSM4	LSM4 Homolog, U6 Small Nuclear RNA And MRNA Degradation Associated	LSM4	911163	1.18032e+06	371316	253358	0.0160731	0.0371353	0.0356049
CIRBP	Cold Inducible RNA Binding Protein	CIRBP	486413	1.4893e+06	130729	680822	0.0218588	0.0391422	0.0372792
SPB6	Serpin Family B Member 6	SERPINB6	8.2542e+06	3.64521e+06	793016	1.67854e+06	0.191157	7.16083e-10	4.31456e-09
GRSF1	G-Rich RNA Sequence Binding Factor 1	GRSF1	1.64517e+06	722361	1.17551e+06	80820.3	0.279302	1.67754e-06	6.90804e-06
ARP19	CAMP Regulated Phosphoprotein 19	ARPP19	828411	1.00702e+06	173372	482396	0.315095	1.9999e-13	1.61231e-12
DCD	Dermcidin	DCD	2.77113e+06	1.02733e+06	443584	1.06259e+06	0.339724	0.0164821	0.0191754
RMD1	Regulator Of Microtubule Dynamics 1	RMDN1	624807	703668	188911	305168	0.353629	1.79411e-06	7.33529e-06
IDHP	Isocitrate Dehydrogenase (NADP(+)) 2	IDH2	4.48733e+06	1.60712e+06	2.50409e+06	434728	0.383795	2.3609e-15	2.7579e-14
UB2G2	Ubiquitin Conjugating Enzyme E2 G2	UBE2G2	1.34614e+06	583513	499809	302588	0.455712	3.92118e-09	2.24447e-08
ACON	Aconitase 2	ACO2	5.84317e+06	1.89154e+06	3.54738e+06	653797	0.456552	9.87707e-19	1.48779e-17
ACADM	Acyl-CoA Dehydrogenase Medium Chain	ACADM	3.5916e+06	1.96726e+06	4.29087e+06	371173	0.472637	0.00788987	0.0107784
CRK	V-Crk Avian Sarcoma Virus CT10 Oncogene Homolog	CRK	794944	605518	707974	159076	0.480446	1.88973e-05	6.181e-05
FAKD4	Transforming Growth Factor Beta Regulator 4	TBRG4	1.38745e+06	510147	550296	336864	0.518433	1.7518e-09	1.03373e-08
NNTM	Nicotinamide Nucleotide Transhydrogenase	NNT	2.231e+07	1.79314e+06	1.7821e+07	626057	0.518461	1.10719e-05	3.9255e-05
ANXA4	Annexin A4	ANXA4	1.0832e+06	1.07177e+06	366650	820571	0.52461	4.51298e-05	0.000124207
NICA	Nicastrin	NCSTN	580345	502575	294743	254427	0.534367	2.39983e-05	7.46551e-05
RBM14	RNA Binding Motif Protein 14	RBM14	1.29e+06	1.60567e+06	448312	1.2955e+06	0.535172	2.20058e-06	8.88755e-06
P5CR2	Pyrroline-5-Carboxylate Reductase 2	PYCR2	790254	593438	381790	347156	0.54056	1.60395e-08	8.50091e-08
NOC2L	NOC2 Like Nucleolar Associated Transcriptional Repressor	NOC2L	487298	721881	333692	334553	0.547762	3.15912e-05	9.46737e-05
TM9S2	Transmembrane 9 Superfamily Member 2	TM9SF2	1.47972e+06	1.22489e+06	1.20587e+06	427336	0.550807	0.00460476	0.00679316
EFGM	G Elongation Factor Mitochondrial 1	GFM1	342416	178713	178197	101678	0.552833	1.0969e-09	6.54022e-09
DDX18	DEAD-Box Helicase 18	DDX18	1.27135e+06	1.729e+06	689501	848477	0.555115	0.000202683	0.000426525
PFKAM	Phosphofructokinase, Muscle	PFKM	2.13002e+06	1.08838e+06	1.4553e+06	570783	0.5899	2.67041e-06	1.0577e-05
SF3B4	Splicing Factor 3b Subunit 4	SF3B4	831336	1.09429e+06	558850	672845	0.591726	0.00309126	0.00488792
NOLC1	Nucleolar And Coiled-Body Phosphoprotein 1	NOLC1	1.83536e+06	4.05361e+06	1.23117e+06	2.07714e+06	0.591857	7.11205e-14	7.17356e-13
SDHA	Succinate Dehydrogenase Complex Flavoprotein Subunit A	SDHA	4.09294e+06	2.12576e+06	2.43474e+06	1.25068e+06	0.592253	1.13182e-16	1.50663e-15
COPD	Archain 1	ARCN1	3.90839e+06	3.74399e+06	2.35157e+06	2.4168e+06	0.600239	1.53297e-05	5.31798e-05
G3BP2	G3BP Stress Granule Assembly Factor 2	G3BP2	1.49121e+06	1.10824e+06	986854	636800	0.61039	3.00947e-09	1.75776e-08
CATA	Catalase	CAT	1.77014e+06	1.058e+06	1.14548e+06	662816	0.624003	9.52524e-06	3.45077e-05
SEC63	SEC63 Homolog, Protein Translocation Regulator	SEC63	721089	352789	657700	152181	0.624315	1.81514e-05	6.04057e-05
RL38	Ribosomal Protein L38	RPL38	3.77383e+06	3.47432e+06	2.67697e+06	2.11606e+06	0.625506	0.00010756	0.000267683
HEXB	Hexosaminidase Subunit Beta	HEXB	1.24167e+07	5.01736e+06	9.82379e+06	2.4912e+06	0.626702	2.57475e-10	1.67475e-09
PIR	Pirin	PIR	2.18655e+06	786008	1.66015e+06	404565	0.631211	4.65937e-07	2.1e-06
YKT6	YKT6 V-SNARE Homolog	YKT6	1.1566e+06	781865	675338	515220	0.633173	2.03975e-05	6.52261e-05
VATC1	ATPase H+ Transporting V1 Subunit C1	ATP6V1C1	1.84234e+06	657633	2.13922e+06	229309	0.635113	0.008896	0.0118419
NPC2	NPC Intracellular Cholesterol Transporter 2	NPC2	2.33453e+06	929334	1.37922e+06	663406	0.635368	4.64643e-05	0.000127254
MCM6	Minichromosome Maintenance Complex Component 6	MCM6	1.54316e+06	996851	896896	704068	0.636575	6.20667e-10	3.82008e-09
CHD4	Chromodomain Helicase DNA Binding Protein 4	CHD4	584070	760747	266521	693158	0.638687	6.26309e-05	0.000163697
NIT2	Nitrilase Family Member 2	NIT2	455289	577290	213260	493324	0.639639	3.58872e-05	0.000103746
ACOD	Stearoyl-CoA Desaturase	SCD	2.38388e+06	632593	2.13121e+06	299388	0.650215	5.01179e-06	1.91249e-05
PPT1	Palmitoyl-Protein Thioesterase 1	PPT1	2.17293e+06	777212	1.0981e+06	638884	0.652377	0.000129196	0.000313353
IDI1	Isopentenyl-Diphosphate Delta Isomerase 1	IDI1	4.51008e+06	716343	4.28414e+06	321161	0.65422	0.00014253	0.000339931
NADC	Quinolinate Phosphoribosyltransferase	QPRT	2.16443e+06	0	927213	0	0.656879	0.00120367	0.0020878

## Sheet: B) Peak values
UniprotKB/Swiss-Prot identifier	A2058-mock 1	A2058-mock 2	A2058-mock 3	A2058-mock 4	A375-mock 1	A375-mock 2	A375-mock-3	A375-mock-4	A2058-upGALC-1	A2058-upGALC-2	A2058-upGALC-3	A2058-upGALC-4	A375-upGALC-1	A375-upGALC-2	A375-upGALC-3	A375-upGALC-4
ABRAL	0	447219	568797	596568	423337	379908	357141	350104	0	0	0	0	0	0	0	0
ACADM	2.19551e+06	3.52443e+06	3.77701e+06	4.86943e+06	1.92446e+06	1.88461e+06	2.02676e+06	2.0332e+06	4.41514e+06	3.53132e+06	4.52101e+06	4.696e+06	211876	443965	455013	373836
ACO13	663629	417153	940447	1.06872e+06	294763	231586	265690	272826	542641	393144	442923	544959	0	0	0	0
ACOD	2.01955e+06	2.57667e+06	2.43745e+06	2.50183e+06	641945	593396	633432	661597	2.22861e+06	1.81567e+06	2.21405e+06	2.26652e+06	274037	309524	290301	323688
ACON	5.54643e+06	5.77868e+06	5.70752e+06	6.34006e+06	2.12427e+06	1.95553e+06	1.74753e+06	1.73883e+06	3.44914e+06	2.8694e+06	3.87011e+06	4.00087e+06	638010	661040	584147	731990
ACOT1	1.70882e+06	855702	1.55853e+06	1.454e+06	192437	198798	193090	177691	1.24254e+06	1.02256e+06	1.32029e+06	1.34696e+06	0	0	0	0
ACSL4	389091	843933	868631	854363	446437	386515	392763	494316	363041	285919	406611	392602	0	0	0	0
ANM5	0	204301	235564	227554	257554	313394	257899	319643	0	0	0	0	178213	231528	309057	310210
ANXA4	514238	1.64985e+06	1.08019e+06	1.08852e+06	1.03572e+06	1.07838e+06	1.10026e+06	1.0727e+06	372945	300541	381770	411346	751746	692595	773057	1.06489e+06
AP1M1	0	263735	227714	203835	466205	342205	395262	338514	0	0	0	0	590365	597497	853032	981609
ARP19	525030	987794	863143	937675	1.0306e+06	798122	1.13432e+06	1.06504e+06	186685	139095	127558	240152	484578	527968	563825	353215
BAG6	0	378748	340013	580511	614229	382818	274305	103377	0	0	0	0	0	0	0	0
BRK1	0	162182	202737	163238	181843	172531	192147	180953	0	0	0	0	0	0	0	0
CASP7	3.09743e+06	3.42709e+06	3.16068e+06	89208.9	3.68447e+06	3.60194e+06	3.50567e+06	144524	2.89655e+06	0	2.79546e+06	0	0	3.50443e+06	0	3.96498e+06
CATA	2.21052e+06	1.51845e+06	1.65796e+06	1.69366e+06	1.17092e+06	1.05503e+06	1.16004e+06	846024	830965	1.37488e+06	893554	1.48252e+06	643910	438895	754904	813554
CHD4	587677	575822	622580	550200	815444	829498	729167	668879	264810	230606	258158	312508	739969	703927	834021	494716
CIRBP	365362	484878	526036	569374	1.46459e+06	1.52159e+06	1.4346e+06	1.53642e+06	272503	0	0	250413	697099	709756	482436	833999
CISD2	1.05147e+06	570712	673975	598161	300721	295793	329501	301406	1.13829e+06	808774	1.04423e+06	1.18438e+06	0	0	0	0
CLP1L	0	432138	575281	546626	0	0	0	0	0	0	0	0	0	0	0	0
COF2	0	399139	429962	383595	256936	257637	240559	213897	0	0	0	0	0	0	0	0
COPD	5.0571e+06	3.33081e+06	3.62343e+06	3.62223e+06	3.70137e+06	3.67523e+06	3.78948e+06	3.80988e+06	3.25591e+06	1.15825e+06	1.88238e+06	3.10973e+06	2.33305e+06	2.40586e+06	2.87349e+06	2.0548e+06
CP51A	0	435710	452237	401305	90387.4	0	0	0	0	0	0	0	0	0	0	0
CPNE1	0	451891	791697	469253	309200	359407	349899	327960	511667	0	560357	503453	0	0	0	0
CRK	749754	822478	792481	815064	701220	592556	560411	567887	736382	512292	803890	779330	167626	154772	141204	172703
CSN3	346462	397247	351727	399899	375998	66335.9	65958.8	77982.4	381979	295145	358881	387754	0	0	0	399005
DBNL	1.27623e+06	2.50949e+06	2.44049e+06	2.51114e+06	2.11876e+06	1.94465e+06	1.67749e+06	2.05558e+06	1.96356e+06	699270	1.57816e+06	1.82011e+06	0	0	356235	374328
DC1L2	0	529694	245000	367687	0	0	0	0	0	0	0	0	0	0	0	0
DCD	1.60893e+06	5.31231e+06	2.6496e+06	1.51369e+06	599077	783808	1.43872e+06	1.2877e+06	501339	37742.2	944285	290969	775703	685112	1.22023e+06	1.56931e+06
DDX18	607458	736951	1.72372e+06	2.01727e+06	2.47385e+06	1.5244e+06	1.42353e+06	1.49423e+06	690447	611628	720712	735216	786901	931547	961759	713699
EFGM	209681	419033	372748	368202	188439	182436	133307	210668	219029	143850	175514	174395	100999	107385	110227	88099.8
FAKD4	843789	1.5667e+06	1.49968e+06	1.63961e+06	508658	442865	502542	586524	575565	436407	553368	635842	344614	309652	373105	320086
G3BP2	1.28781e+06	1.53678e+06	1.35441e+06	1.78582e+06	1.1744e+06	1.21354e+06	1.13249e+06	912524	893193	748523	873543	1.43216e+06	670238	624759	690347	561857
GGH	3.38316e+06	3.77612e+06	2.73999e+06	3.6349e+06	987243	970459	604484	577740	3.26459e+06	2.86608e+06	4.48843e+06	3.35196e+06	0	0	0	0
GLCM	1.16185e+06	4.09618e+06	2.16231e+06	1.93669e+06	657261	639517	482813	509625	3.37772e+06	2.78284e+06	3.43742e+06	2.78288e+06	0	0	0	0
GON7	0	275622	460825	429676	215865	180625	219439	274129	0	0	0	0	0	0	0	0
GRSF1	1.51233e+06	1.38195e+06	1.62318e+06	2.0632e+06	726560	690349	768388	704150	1.14717e+06	1.1084e+06	1.18452e+06	1.26195e+06	66576.3	64676.4	71031.9	120996
GRWD1	0	267461	319914	293859	408417	391505	409563	374086	0	0	0	0	0	0	0	0
H2A1J	0	465564	595979	0	0	1.17259e+06	2.45522e+06	1.26833e+06	0	0	0	0	0	0	0	0
H31	0	1.2431e+06	1.82601e+06	896742	1.99332e+06	2.73988e+06	4.58359e+06	3.2669e+06	0	0	0	0	0	0	0	0
HEXB	1.04407e+07	1.30969e+07	1.29851e+07	1.31442e+07	5.29285e+06	5.04507e+06	4.75498e+06	4.97656e+06	1.0548e+07	8.26497e+06	9.93094e+06	1.05512e+07	2.42712e+06	2.3971e+06	2.50874e+06	2.63186e+06
IDHP	4.16018e+06	4.44664e+06	4.57808e+06	4.7644e+06	1.86903e+06	1.71657e+06	1.43094e+06	1.41195e+06	2.34512e+06	1.63037e+06	2.82167e+06	3.21922e+06	434361	397110	435550	471890
IDI1	4.42788e+06	4.88557e+06	4.66709e+06	4.05978e+06	845342	678471	753675	587882	4.18697e+06	3.85786e+06	4.46314e+06	4.62859e+06	363194	328792	286670	305990
IF4G2	710903	657161	745910	273892	282933	253552	241484	247609	683555	501761	571272	518270	0	0	0	0
KAD3	0	891244	807045	787247	162345	171065	150061	155669	0	0	0	0	0	0	0	0
KLC2	0	390552	562027	0	0	364505	461994	0	0	0	0	0	0	0	0	0
KRT86	0	93091.4	93915.6	36057	156107	165147	7.96933e+06	192765	0	0	0	0	0	0	0	0
LSM4	416005	1.09434e+06	1.09301e+06	1.0413e+06	1.16744e+06	1.11999e+06	1.17597e+06	1.25786e+06	508878	0	554139	422247	0	358614	378923	275896
LSM8	694333	558222	501879	535717	537909	492758	491656	482281	487498	446614	468987	522723	0	0	0	0
LYAG	271695	533869	563290	556961	379832	363568	279093	109137	0	0	153468	168172	0	0	0	0
MCM6	1.46455e+06	1.63471e+06	1.48077e+06	1.59259e+06	1.19545e+06	928811	851855	1.01129e+06	1.01088e+06	661182	850983	1.06454e+06	667978	603641	776423	768231
MGST1	2.28527e+06	2.35455e+06	2.30574e+06	2.50411e+06	322952	313135	112370	136319	2.18084e+06	1.73156e+06	2.21004e+06	2.35887e+06	0	0	0	0
MPPB	962725	1.14918e+06	1.23477e+06	1.39015e+06	1.00057e+06	996931	891048	324375	583934	470429	641953	656223	0	0	0	0
MTND	0	497534	451029	405186	691804	542738	561711	503869	0	0	0	0	636419	577117	631372	638786
MTX2	0	0	0	601329	506099	367771	317883	422349	0	0	0	0	0	0	0	0
MUC18	585466	1.60053e+06	1.26208e+06	1.10574e+06	491024	459280	514709	453033	1.30335e+06	970813	791043	994780	0	0	0	0
NADC	1.65196e+06	1.92153e+06	2.72532e+06	2.35889e+06	0	0	0	0	884882	727786	1.05697e+06	1.03921e+06	0	0	0	0
NICA	341606	706708	645990	627077	586590	616538	596638	210535	308969	227829	339795	302378	302090	223789	254127	237702
NIPS2	396908	540055	473443	433517	0	0	0	0	0	0	0	0	0	0	0	0
NIT2	473979	366069	343905	637204	570946	555866	551760	630590	192756	199131	216471	244680	546160	433194	448007	545935
NNTM	2.05153e+07	2.31197e+07	2.23398e+07	2.32652e+07	2.35459e+06	1.65298e+06	1.66486e+06	1.50013e+06	1.91385e+07	1.4396e+07	1.92319e+07	1.85174e+07	987812	519136	495006	502274
NOC2L	382510	334938	619693	612050	706618	801194	719884	659827	575575	191670	258179	309345	312888	291546	313583	420193
NOLC1	2.28264e+06	1.84406e+06	1.78063e+06	1.4341e+06	3.24265e+06	4.16188e+06	4.61847e+06	4.19143e+06	1.33462e+06	1.11481e+06	1.22697e+06	1.2483e+06	2.02636e+06	2.16326e+06	1.96576e+06	2.15318e+06
NPC2	2.68576e+06	2.18458e+06	2.37796e+06	2.08983e+06	1.1068e+06	732428	916700	961411	1.82978e+06	768264	1.75874e+06	1.16009e+06	695307	630371	636304	691642
NUP62	0	1.98292e+06	1.11782e+06	1.25522e+06	323657	424132	377328	530177	0	0	0	523203	550468	484529	0	0
P5CR2	420453	866311	953452	920797	562959	538890	628232	643672	375696	272872	433056	445537	335297	327414	357432	368483
PFKAM	2.28356e+06	2.36827e+06	1.72575e+06	2.14249e+06	1.47348e+06	1.04347e+06	907472	929080	888733	1.1793e+06	1.63058e+06	2.12258e+06	531878	553359	546663	651232
PGRC2	733974	823010	1.41897e+06	1.44301e+06	505703	657086	504190	635244	1.07198e+06	919701	1.26499e+06	1.19332e+06	0	0	0	0
PIHD1	0	524537	0	474837	384922	437508	424577	421537	0	0	0	0	0	0	0	0
PIR	1.4256e+06	2.27649e+06	2.53744e+06	2.50668e+06	855144	748164	772947	767778	1.77293e+06	1.49657e+06	1.63469e+06	1.73642e+06	429340	455081	387287	346552
PON2	1.14475e+06	2.05247e+06	1.92157e+06	2.03726e+06	337505	96492.9	118961	99147.2	2.67175e+06	2.06909e+06	2.40388e+06	2.54725e+06	0	0	0	261070
PPT1	2.27948e+06	1.9103e+06	2.4713e+06	2.03063e+06	1.14881e+06	606525	633835	719681	1.09466e+06	853002	1.13693e+06	1.3078e+06	662011	546792	674740	671991
RBM14	870782	1.55831e+06	1.36658e+06	1.36431e+06	1.73074e+06	1.34235e+06	1.60288e+06	1.74674e+06	461051	385192	460827	486178	1.15751e+06	1.25688e+06	1.42845e+06	1.33917e+06
RL38	3.98554e+06	3.90848e+06	3.61126e+06	3.59006e+06	3.36433e+06	3.64182e+06	3.51089e+06	3.38024e+06	2.51558e+06	2.15786e+06	2.9152e+06	3.11924e+06	1.43781e+06	1.30749e+06	1.98736e+06	3.73156e+06
RMD1	201297	715129	742258	840544	771523	789004	707836	546310	188924	177800	219308	169612	168261	668848	188288	195276
RPF2	0	449206	444452	384496	525113	403265	440836	501152	0	0	0	0	0	0	0	0
RRS1	0	404118	443779	428360	550106	537704	493213	545842	0	0	0	0	484767	460506	442198	498457
S100B	0	723054	725701	477232	182403	405604	1.26423e+06	511529	297889	876976	243574	480878	0	0	0	0
SDHA	3.31433e+06	3.88873e+06	4.61092e+06	4.55781e+06	2.343e+06	2.37611e+06	1.85473e+06	1.92921e+06	2.32659e+06	2.00848e+06	2.39648e+06	3.0074e+06	1.3246e+06	1.18078e+06	1.15592e+06	1.34144e+06
SDHB	624751	1.05405e+06	1.19991e+06	1.5621e+06	670076	675474	615287	607544	977100	1.21807e+06	1.44722e+06	1.32022e+06	0	0	0	0
SEC63	766600	718807	711893	687056	332039	374217	332440	372460	705852	539668	695253	690029	135288	136213	165137	172085
SF3B4	563724	844241	984259	933122	987726	1.05146e+06	1.08946e+06	1.24851e+06	433638	381909	491187	928665	1.0092e+06	935642	277221	469321
SOX5	0	0	0	0	715638	769764	711104	802625	0	0	0	0	0	0	0	0
SPB6	7.05994e+06	8.91374e+06	9.36112e+06	7.68201e+06	3.75033e+06	3.6028e+06	3.82363e+06	3.40407e+06	423098	349532	787281	1.61215e+06	1.9628e+06	1.35317e+06	1.90079e+06	1.49739e+06
SUCB1	378681	828332	733071	802977	391498	401788	375908	388782	328322	546630	717207	617550	0	0	0	198904
TBL2	0	464002	755770	699579	336955	386138	315769	485888	0	0	454033	572307	0	0	0	0
THIM	238924	1.16607e+06	1.22933e+06	1.1497e+06	410117	467612	470389	186152	353206	222274	341511	315370	0	0	0	0
TM9S2	515502	1.76541e+06	1.81919e+06	1.81879e+06	1.26566e+06	1.29514e+06	1.12809e+06	1.21066e+06	676171	1.12771e+06	1.61567e+06	1.40391e+06	476440	399188	404403	429313
TMED5	452895	410848	501944	435705	171201	208153	272721	272994	896590	646560	921530	796172	0	0	0	0
TSN	1.00695e+06	447727	850737	470006	250978	215547	260005	256549	453348	449296	440785	1.15548e+06	0	0	0	0
TXTP	1.29295e+06	1.7278e+06	1.12953e+06	1.10515e+06	273073	266378	255839	268329	520190	488390	598015	509882	0	0	0	0
UB2G2	1.36203e+06	1.3085e+06	1.19253e+06	1.52151e+06	845246	775444	386336	327024	497498	412323	576915	512499	348544	313463	272412	275934
UBP7	0	360131	312296	344157	503366	0	367156	532772	0	0	0	0	0	0	0	0
ULA1	346739	305688	296274	296749	414772	519327	504272	370067	0	0	290924	278749	0	0	0	0
UQCC2	0	452127	420895	437081	248013	309923	254558	306817	0	0	0	0	0	0	0	0
URM1	0	351225	396683	375824	564591	603679	494577	571227	0	0	0	0	350158	376523	525134	570700
VATC1	2.12668e+06	1.96565e+06	1.46823e+06	1.80879e+06	619579	704641	656961	649350	2.18335e+06	1.87762e+06	2.25321e+06	2.2427e+06	188276	254399	203564	270996
YKT6	787737	1.21944e+06	1.25608e+06	1.36312e+06	905786	892164	866146	463365	646288	547271	684472	823322	574046	540974	505096	440764
YTHD2	0	316250	363791	317142	383743	408147	417042	440130	0	0	0	0	481728	514745	497872	441154
